# Supplementary material
Source: PubMed Central journal article supplement (PMC2474518)
Supplement: 0803749105_0803749105SI.pdf [file 0803749105_0803749105SI.pdf]

# Supporting Information

R Parmigiani 10.1073/pnas.0803749105

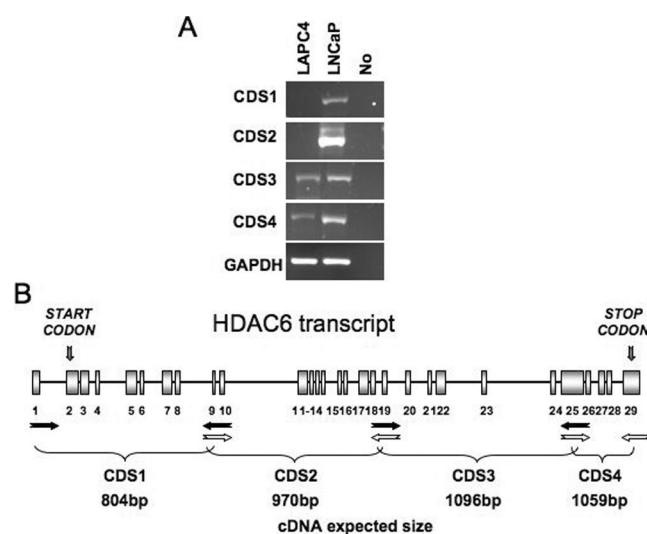

**Fig. S1.** HDAC6 transcript expression analysis. (A) RT-PCR analysis of the HDAC6 transcript in LAPC4 and LNCaP cells corresponding to the CDS1, CDS2, CDS3, and CDS4 fragments. GAPDH was used as an amplification control. (B) Schematic representation of HDAC6 transcript with the RT-PCR primer locations. Boxes represent the exons, and the lines indicate the introns.
